# Supplementary material
Source: Springer Nature journal article supplement (https://www.springermedizin.de/resource/supplementary/12889_2012_5457_MOESM1_ESM.pdf/9495402)
Supplement: MOESM1 [file 9495402]

# I. Weight Gain Study

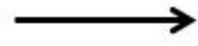

# II. One-group pretest-posttest

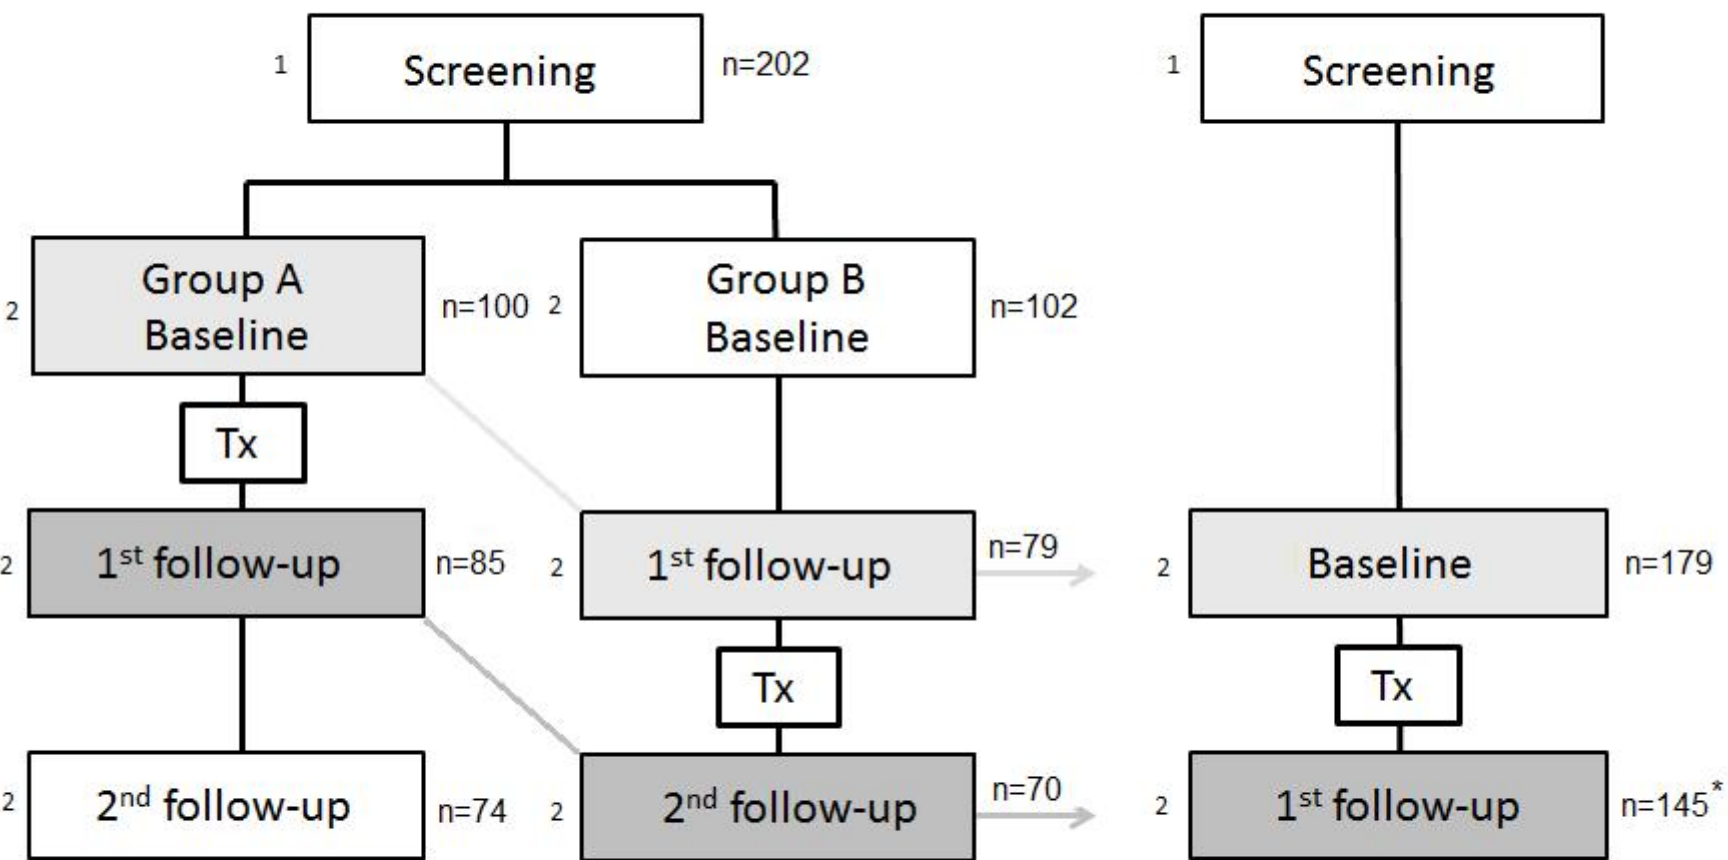

<sup>1</sup> Clinical dental examination

<sup>2</sup> Anthropometric and OHRQoL data

\* 10 excluded due to missing data (2 in Group A, 8 in Group B)
